# Supplementary material
Source: PubMed Central journal article supplement (PMC3447779)
Supplement: supp_blood-2011-11-391342_blood-2011-11-391342-1.pdf [file supp_blood-2011-11-391342_blood-2011-11-391342-1.pdf]

## SUPPLEMENTARY INFORMATION

1. Supplementary Experimental Procedures: 9 sections
2. Supplementary Tables: 3 tables
3. Supplementary Figures: 8 figures
4. Supplementary References: 20 references

### SUPPLEMENTARY EXPERIMENTAL PROCEDURES

#### Animals and Arthritis Induction

C57BL/6 (B6; Ly5.2) and B6.SJL-Ptprc<sup>a</sup>Pep3<sup>b</sup>/BoyJ (B6; Ly5.1) were purchased from Jackson Laboratory and maintained in our suite. KRN TCR transgenic mice on a B6 background (KRN; Ly5.2) and C57BL/6 congenic mice bearing arthritogenic I-A<sup>g7/g7</sup> MHC-II molecule (G7; Ly5.2) <sup>1</sup> were both obtained from Dr. Paul Allen (Washington University) and maintained in our suite.

The G7;Ly5.1 strain was generated in this study from G7;Ly5.2 and B6;Ly5.1 mice first to generate B6xG7 (Ly5.1xLy5.2) and then intercrossing F1s to generate G7;Ly5.1. G7 genotyping was performed using a biotin conjugated anti – G7 antibody kindly provided by Dr. Emil Unanue (Washington University). B6xG7 mice were generated from B6;Ly5.2 or B6;Ly5.1 crossed with G7;Ly5.2 or G7;Ly5.1 parents to get mice with different *Ly5* alleles - Ly5.1+Ly5.2-, Ly5.1+Ly5.2+, Ly5.1-Ly5.2+. KRNxG7 were generated by crossing KRN mice with G7;Ly5.2 or G7;Ly5.1 mice to get arthritic mice with different *Ly5* alleles – Ly5.1-Ly5.2+ and

Ly5.1+Ly5.2+ respectively. In all experiments, KRN, G7 and/or B6xG7 mice, which are all non-arthritis were used as controls to arthritis KRNxG7 mice.

For serum transfer arthritis, mice 7 days post serum transfer were used for experiments. Development of arthritis was confirmed visually and by measurement of ankle thickness since arthritis development was variable and not as robust as KRNxG7 spontaneous chronic model consistent with previous reports <sup>2</sup>.

#### Tissue Preparation

Where analyzed, peripheral blood (PB) was collected by retroorbital bleeding before sacrificing mice. Mice were sacrificed by cervical dislocation or CO<sub>2</sub> asphyxiation. Bone marrow (BM) was collected from tibia(e) and/or femur(s) by flushing as previously described <sup>3</sup> or by brief high speed centrifugation of bones longitudinally aligned in a perforated eppendorf tube. Retrieved cells were red blood cell (RBC) lysed (RBC lysis buffer, Roche) or prepared for magnetic sorting without RBC lysis as described below. Peripheral blood was subjected to 2 rounds of RBC lysis due to abundant red blood cells.

#### Flow Cytometry and Fluorescence Activated Cell Sorting (FACS)

Antibodies used in this study are listed in Table S1. Flow cytometry was performed on a FACScalibur (BD) and modified FACScans (BD) with 2 and 3 lasers capable of 5 and 8 color analyses respectively or on a MoFlo (Dako). Data was analyzed using FlowJo software (Treestar).

For purification of GMP, KSL or HSC enriched fractions of KSL cells harvested whole bone marrow cells were initially depleted of mature cells using MACS lineage depletion kit (Miltenyi) and LS columns (Miltenyi) prior to FACS. Specifically, bone marrow from both tibiae and femurs (about  $50 \times 10^6$  cells) were incubated with  $40 \mu\text{l}$  of lineage antibody cocktail followed by  $80 \mu\text{l}$  of microbead conjugated anti-biotin antibody. Magnetic sorting does not completely deplete Lin<sup>+</sup> cells especially for arthritic mice, probably because the Lineage antibody cocktail formulation is tailored to lineage frequencies present in control mice which are different from those in arthritic mice. Therefore, we stained lineage-depleted bone marrow with fluorophore conjugated lineage marker antibodies to gate out residual Lin<sup>+</sup> cells during FACS. These cells were also stained with fluorophore conjugated progenitor marker antibodies:  $\alpha$ -Kit,  $\alpha$ -Sca1,  $\alpha$ -FcγR. KSL cells or GMPs were sorted using MoFlo (Dako). Purity of KSL sorting was about 95% determined by post sort analysis. Lineage antibodies used were  $\alpha$ -Ter119 (for erythrocytes),  $\alpha$ -B220 (for B cells),  $\alpha$ -Mac1 and  $\alpha$ -Gr1 (for myeloid cells) and  $\alpha$ -CD3,  $\alpha$ -CD4,  $\alpha$ -CD8 and/or  $\alpha$ -TCR $\beta$  (for T cells). Common lymphoid progenitors were excluded by restrictive gating on Kit<sup>hi</sup> cells and by addition of  $\alpha$ -IL7R $\alpha$  to the lineage cocktail.

For Ki67 intracellular staining of HSC enriched populations, BM cells were lineage depleted by magnetic sorting (as described above). Lineage depleted cells were surface stained with antibodies to Kit, Sca1, lineage markers and IL7R $\alpha$ , as described above, as well as CD150 and CD48. PerCP-Cy5.5 conjugated IL7R $\alpha$ , CD48, and lineage antibodies were used to minimize the number of channels for analysis. Cells were then fixed and permeabilized using BD cytofix/cytoperm solution. Fixed cells were then incubated with Ki67 FITC antibody (BD) or FITC conjugated isotype control antibody (BD).

### Methylcellulose Colony Replating

KSL cells or GMP enriched cells (Kit+Sca1-Lin-IL7R $\alpha$ -Fc $\gamma$ RIII/II<sup>hi</sup>) from 6-9 week old, age and sex-matched (male) arthritic and control mice were sorted on a MoFlo as described above. KRN, G7 or B6xG7 mice were used as controls. Granulocyte and Macrophage (GM) restricted (HSC 008; R & D) and Erythroid restricted (Methocult SF M3436; Stem Cell Technologies) methylcellulose based media were used for replating according to manufacturer's product information sheet with minor modifications. Each population (KSL or GMP) from each mouse was plated in duplicate. 200 cells per plate were used for replating on GM-restricted plates. KSL cells formed much fewer colonies in erythroid restricted plates and so 1000 cells per plate was used. GM colonies were enumerated on day 7-10 while erythroid colonies were enumerated on D14. Colony counts were performed in a blinded manner and mean count of duplicate plates for each mouse determined. These values were then used in subsequent statistical analysis. Plating efficiency was calculated as (number of colonies/number of progenitor cell input) x 100. Colony formation on complete media (Methocult GF M3434, Stem Cell Technology, not shown) was similar to colony formation on GM-restricted media (Figure S1B & S1C).

### Differentiation on OP9 cells

Cultured cells were recovered by vigorous suspension instead of enzymatic digestion due to the potential of enzymatic destruction of epitopes which would negatively impact subsequent flow cytometric analyses. About 90% or more of cells were

recoverable by vigorous re-suspension. KSL cells typically expanded about 100-1000 fold with about 40% to 60% of the cells being B220+Gr1- (Figure S1D).

#### Osteoclast *In vitro* assay

To maintain healthy growth conditions, half of culture media was replaced with fresh media ( $\alpha$ MEM + 10% serum + 10% CMG supernatant + RANKL + antibiotics) on D2 and daily afterwards. GMP cells from arthritic or control mice that are at least 6 weeks of age robustly and consistently generated osteoclasts *in vitro* and thus were used as a positive control. Note that typical protocols for generating osteoclasts *in vitro* involve priming whole bone marrow by culturing with M-CSF for about 3 days to generate what is referred to as “bone marrow macrophages”. These are then subsequently cultured with M-CSF and RANKL, to generate mature osteoclasts in about 5 more days. However to test osteoclast potential of specific cell populations as we have done in this study, the sorted cells are cultured with M-CSF and RANKL from the first day with no initial priming with M-CSF alone.

#### Transplantation

Recipient mice were lethally irradiated (10Gy; single dose) a day before cell transplantation. Lethally irradiated mice were administered antibiotic treated water – changed twice weekly - for 3 weeks following irradiation. Sorted cells were pelleted and resuspended in HBSS and a 200 $\mu$ l volume of suspension was transplanted via the tail vein. For competitive transplantation, cell suspensions from 2 competing strains were mixed at the appropriate concentrations and injected in the same 200 $\mu$ l volume.

Effectiveness of irradiation was verified by death of non-transplanted irradiated mice less than 2 weeks after irradiation and markedly low chimerism of recipient derived cells in transplanted mice.

We were unable to track erythroid chimerism because mature erythroid cells do not express CD45 and erythroid precursors have very low to no CD45 expression. Also even though T cell chimerism analysis was possible, these results do not reflect T lineage potential because KRNxG7 derived T cells, which express autoreactive KRN TCR, are negatively selected<sup>1,3</sup>. The elimination of arthritic KSL derived T cells also makes it impossible to determine overall CD45 chimerism of arthritic versus control KSL cells although contribution to individual lineages can be assessed.

Preliminary analysis showed hardly any leukocytes in peripheral blood at very early time point (10 days or less) post transplantation. Therefore for D6 time point only bone marrow was analyzed. In fact total cell count of RBC lysed bone marrow retrieved from both tibiae and femurs of recipient mice 6 days after transplantation was about  $2 \times 10^5$  cells, about 200 fold lower than typical cellularity of unirradiated mice. At this early time point B220+ cells were also hardly existent in the bone marrow. By 16 days post transplantation, bone marrow cellularity had largely recovered with cell count of close to  $3 \times 10^7$ . Mice used for 6 day- (N=4) and 16 day- (N=4) analyses were sacrificed in order to analyze bone marrow. Peripheral blood from remaining recipient mice from the same transplant cohort (N=4) was sampled non-lethally at subsequent time points (5wks, 9wks).

For transplantation into old recipients, 5 recipient mice were used. One recipient failed to engraft donor cells appreciably (<5% total donor contribution to Mac1+Gr1hi cells) and was therefore excluded from mean and standard deviation analyses presented in Figure 2D. Nevertheless, this mouse still displayed the same pattern of higher myeloid cell output from arthritic KSL

cells. Eight weeks post transplant, the PB of this recipient comprised 70% Mac1+Gr1hi cells higher than that of the other mice in the cohort (Figure S3B). Of the <5% of these Mac1+Gr1hi cells that were donor derived, 3.15% (99% of total donor derived cells) was arthritic KSL derived and only 0.026% (1% of total donor derived cells) were control KSL cell derived. On the other hand, in this same mouse, B220+ frequency at 8wks (11.4%) was lower than the other mice in the cohort, with majority of these cells coming from control KSL cells (84.5% of all, 95% of donor derived cells). Only 4.2% of the B220+ cells (5% of donor derived cells) came from arthritic mice. This and another recipient died before the 26wk analysis time point. Therefore 8wk and 16wk analyses were performed with N=4 recipients while 26wk analysis was performed with N=3 recipients.

#### Microarray and Bioinformatics Analysis

Total RNA was extracted and purified from FACS sorted CD45+KSL cells and RBC lysed Lin+ fraction of MACS sorted bone marrow using Arcturus Picopure RNA kit (Applied Biosystems). 3 strains were used – KRNxG7 arthritic mice, KRN non-arthritic control mice and B6xG7 non-arthritic control mice. Therefore there were 6 samples in total. For each strain, KSL cells and Lin+ cells were from 7-9 pooled mice. All mice were age matched (6-7wks).  $3.7 \times 10^5$  B6xG7 KSL,  $4.7 \times 10^5$  KSL,  $7.4 \times 10^5$  KRNxG7 KSL and  $1 \times 10^6$  Lin+ cells from each strain were used for RNA extraction. Purified RNA was linearly amplified and RNA from all 6 samples run on an Affymetrix Mouse 430 2.0 gene chip. Linear amplification and microarray were carried out at Laboratory for Clinical Genomics core facility at Washington University School of Medicine (<http://pathology.wustl.edu/research/cores/lcg/index.php>)

Microarray raw data was extracted and analyzed using dChip software (<http://www.biostat.harvard.edu/complab/dchip/>).

“Upregulated genes” are at least 20% increased in arthritic KSL cells relative to *both* control KSL cell populations (from B6xG7 and KRN – both non-arthritic) examined in this study. Similarly “downregulated genes” were at least 20% reduced relative to *both* control KSL expression levels.

Clustering analysis comparing gene chips from this study to each other and other stem cell and mature cell populations from previous studies was carried out using GOurmet software<sup>4, 5</sup>. Briefly, average expression of genes in mature cells was determined from the three Lin+ microarray results using dChip. Lists of genes enriched in each KSL population relative to mature cells were then determined by comparing raw expression in the KSL population with the predetermined average expression of the mature cells. Fractional representation of GO terms associated with each gene list was calculated and then each cell population was then compared with previous gene expression studies at the level of the GO term representation (See Table S2).

DAVID online resource<sup>6-8</sup> was used for other bioinformatics analysis particularly functional annotation of differentially regulated genes.

#### Quantitative Real Time PCR (qRT-PCR)

For KSL sorting 3 independent arthritic mice and 3 independent control mice were used. For CD150+48-CD34-KSL cells, 3 independent pools each from arthritic and control mice were used; each pool contained cells from 2 mice. For each experiment (KSL or CD150+CD48-CD34-KSL) sorting from all mice was performed on the same day ensuring exact same sorting gates were used.



Collected cells in trizol were vortexed and stored at -80°C. Standard trizol RNA extraction according to manufacturers instruction was used extract RNA with the exception that linear acrylamide (Ambion) was used as a carrier. We estimated RNA yield to be less than 1mcg and hence all RNA extracted was used for subsequent steps including DNase digestion and 1<sup>st</sup> Strand cDNA synthesis using Superscript III reverse transcriptase (Invitrogen). cDNA obtained was diluted in autoclaved distilled water and qRT-PCR performed with Sybr Green as done previously <sup>3,9</sup>. QRT-PCR primers used in this study are listed in Table S3.

## SUPPLEMENTARY TABLES

**Table S1. Antibodies used in this study**

| <b>Molecule</b> | <b>Clone</b> | <b>Color</b>                                      | <b>Source</b>              |
|-----------------|--------------|---------------------------------------------------|----------------------------|
| Kit             | 2B8          | FITC, APC, APC-Cy7, APC-eFluor780                 | Biologend, Ebioscience     |
| Sca1            | D7           | PE, PerCP-Cy5.5, APC, FITC                        | BD, Biologend, Ebioscience |
| CD3             | 145-2C11     | FITC, PerCP-Cy5.5, APC                            | Biologend, Ebioscience     |
| CD4             | GK1.5        | FITC                                              | BD, Biologend, Ebioscience |
| CD4             | RM4-5        | PerCP-Cy5.5                                       | Ebioscience                |
| CD8             | 53-6.7       | FITC, PerCP-Cy5.5                                 | Biologend, Ebioscience     |
| TCRb            | H57-597      | PerCP-Cy5.5                                       | Biologend                  |
| B220            | RA3-6B2      | FITC, PE, PerCP-Cy5.5, APC-Cy7                    | Biologend, Ebioscience     |
| Mac1            | M1/70        | FITC, PE, PerCP-Cy5.5, Alexa 647                  | BD, Biologend, Ebioscience |
| Gr1             | RB6-8C5      | FITC, PE, PerCP-Cy5.5, APC, APC-Cy7               | BD, Biologend, Ebioscience |
| Ly6G            | 1A8          | FITC, APC                                         | Biologend                  |
| cFms            | AFS98        | PE                                                | Biologend, Ebioscience     |
| Ly6C            | AL-21        | Biotin, FITC                                      | BD                         |
| Ter119          | Ter119       | FITC, PerCP-Cy5.5                                 | Biologend, Ebioscience     |
| IL-7Ra          | A7R34        | FITC, PerCP-Cy5.5, Biotin                         | Ebioscience, Biologend     |
| FcgR III/lib    | 2.4G2        | PE, purified for blocking                         | BD                         |
| FcgR III/lib    |              | 93 Alexa 647, purified for blocking               | Biologend                  |
| CD34            | RAM34        | FITC, Alexa647                                    | Ebioscience, BD            |
|                 | TC15-        |                                                   |                            |
| CD150           | 12F12.2      | PE, APC, PE-Cy7                                   | Biologend                  |
| CD48            | HM48-1       | FITC, PerCP-Cy5.5                                 | Biologend, Ebioscience     |
| CD11c           | N418         | FITC, APC                                         | Biologend                  |
| CD45            | 30-F11       | FITC, PE, PerCP-Cy5.5, APC, APC-eFluor780, PE-Cy7 | BD, Biologend, Ebioscience |
| CD45.1          | A20          | FITC, PE, APC                                     | Ebioscience, Biologend     |
| CD45.2          |              | 104 FITC, PE, APC                                 | Ebioscience, Biologend     |
| CD71            | C2           | FITC                                              | BD                         |
| CD71            | R17217       | APC                                               | Ebioscience                |
| NK1.1           | PK136        | PE                                                | BD                         |

Streptavidin  
Lineage cocktail

APC  
Biotin

BD, Ebioscience  
Miltenyi

**Table S2. References for gene chips used for dendrogram analysis.**

| <b>Name</b>                  | <b>Reference</b> |
|------------------------------|------------------|
| Mature Skin                  | 10               |
| Mature Hematopoietic Cells 1 | This Study       |
| Mature Gastric Cells 1       | 11               |
| Mature Small Intestine       | 12               |
| Brain                        | 13               |
| Mature Gastric Cells 2       | 14               |
| Mature Gastric Cells 3       | 11               |
| Mature Hematopoietic Cells 2 | 13               |
| Mature Hematopoietic Cells 3 | 15               |
| Neural Progenitors           | 13               |
| Neural Progenitors           | 15               |
| Gastric Progenitors          | 16               |
| Mesenchymal Progenitors      | 17               |
| Small Intestine Progenitors  | 18               |
| Skin Progenitors             | 19               |
| Hematopoietic Progenitor 4   | 20               |
| Hematopoietic Progenitor 1a  | This Study       |
| Hematopoietic Progenitor 1c  | This Study       |
| Hematopoietic Progenitor 1b  | This Study       |
| Hematopoietic Progenitors 2  | 13               |
| Hematopoietic Progenitors 3  | 15               |

**Table S3. Quantitative RT-PCR primers used in this study**

| <b>Gene</b> | <b>Primer Orientation</b> | <b>Primer Sequence</b>  | <b>Amplicon Size (bp)</b> | <b>Source</b>         |           |
|-------------|---------------------------|-------------------------|---------------------------|-----------------------|-----------|
| C/EBPb      | f                         | AAGCTGAGCGACGAGTACAAGA  | 116                       |                       | NM_009883 |
| C/EBPb      | r                         | GTCAGCTCCAGCACCTTGTG    |                           |                       |           |
| Ccr2        | f                         | ATCCACGGCATACTATCAACATC | 104                       | Primerbank 6753466a1  | NM_009915 |
| Ccr2        | r                         | CAAGGCTCACCATCATCGTAG   |                           |                       |           |
| Chi3l3      | f                         | AGAAGGGAGTTTCAAACCTGGT  | 109                       | Primerbank 6753416a2  | NM_009892 |
| Chi3l3      | r                         | GTCTTGCTCATGTGTGTAAGTGA |                           |                       |           |
| Ear1        | f                         | CTGTTGGTGTGTGTGGAAATCC  | 119                       | Primerbank 6681249a3  | NM_007894 |
| Ear1        | r                         | ATTTGTTGCCCGACTGGTGAT   |                           |                       |           |
| EKLF (Klf1) | f                         | AGACTGTCTTACCCTCCATCAG  | 165                       | Primerbank 6754454a1  | NM_010635 |
| EKLF (Klf1) | r                         | GGTCCTCCGATTTTCAGACTCAC |                           |                       |           |
| Fcgr1b      | f                         | ATGGGAATCCTGCCGTTCTTA   | 117                       | Primerbank 6857783a3  | NM_010187 |
| Fcgr1b      | r                         | CCCAGCAGCAAGATTTAGCAC   |                           |                       |           |
| Fcgr1l      | f                         | TCACTGTCCAAGATCCAGCAA   | 137                       | Primerbank 6753834a2  | NM_010188 |
| Fcgr1l      | r                         | CGGGGTTTGAAGATTTCTCCGTA |                           |                       |           |
| Fog1 (Zfp1) | f                         | CAGAGCCTTATCCCCTGAGAG   | 107                       | Primerbank 6677633a2  | NM_009569 |
| Fog1 (Zfp1) | r                         | CGGCTTCTTCAGTTAGGACCT   |                           |                       |           |
| Gata1       | f                         | ATGGAATCCAGACGAGGAAC    |                           | <sup>9</sup>          | NM_008089 |
| Gata1       | r                         | CTCCCCACAATTTCCCACTAC   |                           |                       |           |
| Ikaros      | f                         | AGACAAGTGCCTGTCAGACAT   | 110                       | Primerbank 6677651a1  | NM_009578 |
| Ikaros      | r                         | CCAGGTAGTTGATGGCATTGTTG |                           |                       |           |
| Mpa2l       | f                         | GTTCCAGGAAGTAACAAAGGCT  | 102                       | Primerbank 31127098a1 | NM_194336 |
| Mpa2l       | r                         | ATCCCTAGTCTATTCCCAGTGAC |                           |                       |           |
| PU.1        | f                         | GAACAGATGCACGTCCTCGAT   | 107                       |                       | M38252    |
| PU.1        | r                         | GGGGACAAGGTTTGATAAGGGAA |                           |                       |           |
| Runx1       | f                         | CTTCCTCTGCTCCGTGCTA     |                           |                       | NM_009821 |
| Runx1       | r                         | CTGCCGAGTAGTTTTTCATCG   |                           |                       |           |
| S100a8      | f                         | AAATCACCATGCCCTCTACAAG  | 165                       | Primerbank 7305453a1  | NM_013650 |
| S100a8      | r                         | CCCACTTTTATCACCATCGCAA  |                           |                       |           |
| S100a9      | f                         | ATACTCTAGGAAGGAAGGACACC | 129                       | Primerbank 6677837a1  | NM_009114 |
| S100a9      | r                         | TCCATGATGTCATTTATGAGGGC |                           |                       |           |

|       |   |                        |     |                       |           |
|-------|---|------------------------|-----|-----------------------|-----------|
| SOCS3 | f | CAAGAACCTACGCATCCAGTG  | 101 | Primerbank 6671758a3  | NM_007707 |
| SOCS3 | r | CCAGCTTGAGTACACAGTCGAA |     |                       |           |
| VWF   | f | CTTCTGTACGCCTCAGCTATG  | 125 | Primerbank 33186908a1 | NM_011708 |
| VWF   | r | GCCGTTGTAATCCCACACAAG  |     |                       |           |

**SUPPLEMENTARY FIGURES**

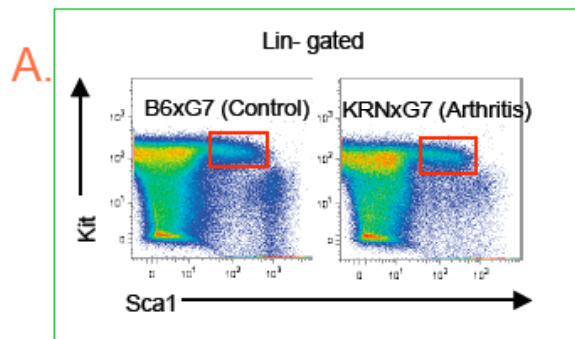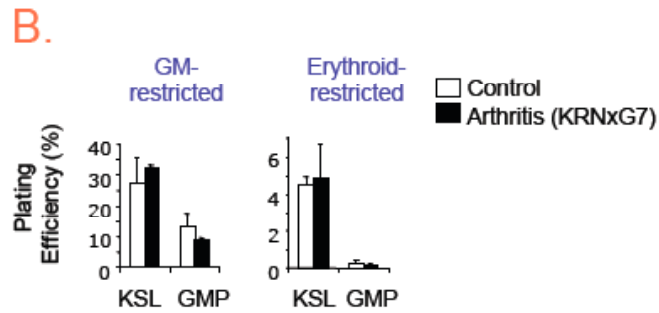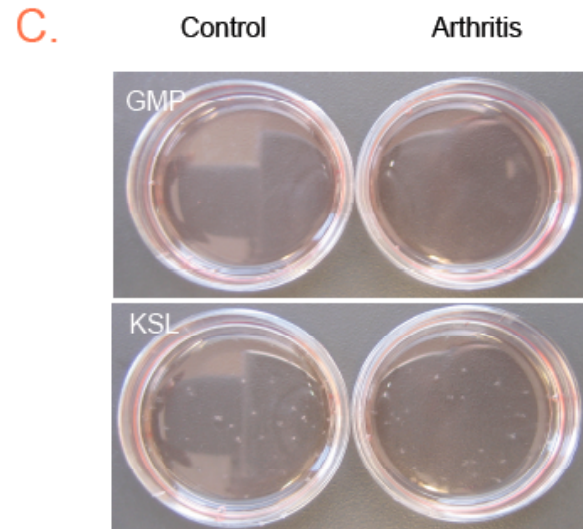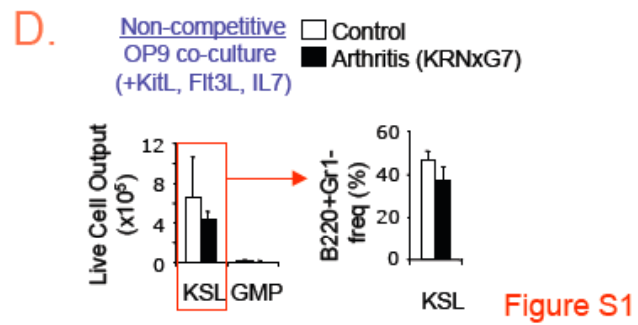

**Figure S1. KSL phenotype identifies a similar population of bonafide uncommitted progenitors in arthritic and control mice**

- A. Kit-Sca plot of Lin-IL7Ra- cells from bone marrow of B6xG7 and KRNxG7 mice to indicate KSL cells used for various analyses in this study (*Top Panel*). Note that there is no “Sca-1 shift” which occurs in some models of inflammation associated with abundant IFN $\gamma$  production such as following LPS injection of mice (*Bottom panel*).
- B. Quantification of colonies formed by sorted BM GMP (Kit+Sca1-Lin-CD34+Fc $\gamma$ RIII/IIb) and KSL cells in methylcellulose plates. “GM restricted” plates contain recombinant KitL, Interleukin (IL)-3 and -6 without erythropoietin (EPO). “Erythroid restricted” plates is serum free and contains EPO. (See Supplemental Experimental Procedures for source of media).
- C. “GM restricted” methylcellulose plates (day 7-8) depicting macroscopic KSL derived colonies from arthritic or control mice, visible as specks. GMP derived colonies are only visible under a microscope.
- D. *Left Panel*: Cell output 6-7 days after growing 3000 sorted BM KSL cells or GMPs from arthritic and control mice on irradiated OP9 feeder cells in the presence of KitL, Flt3L and IL-7 to promote B cell differentiation.  
*Right Panel*: B lymphocyte analysis of cells generated by KSL cells on irradiated OP9 feeder cells in the presence of KitL, Flt3L and IL-7 to promote B cell differentiation.

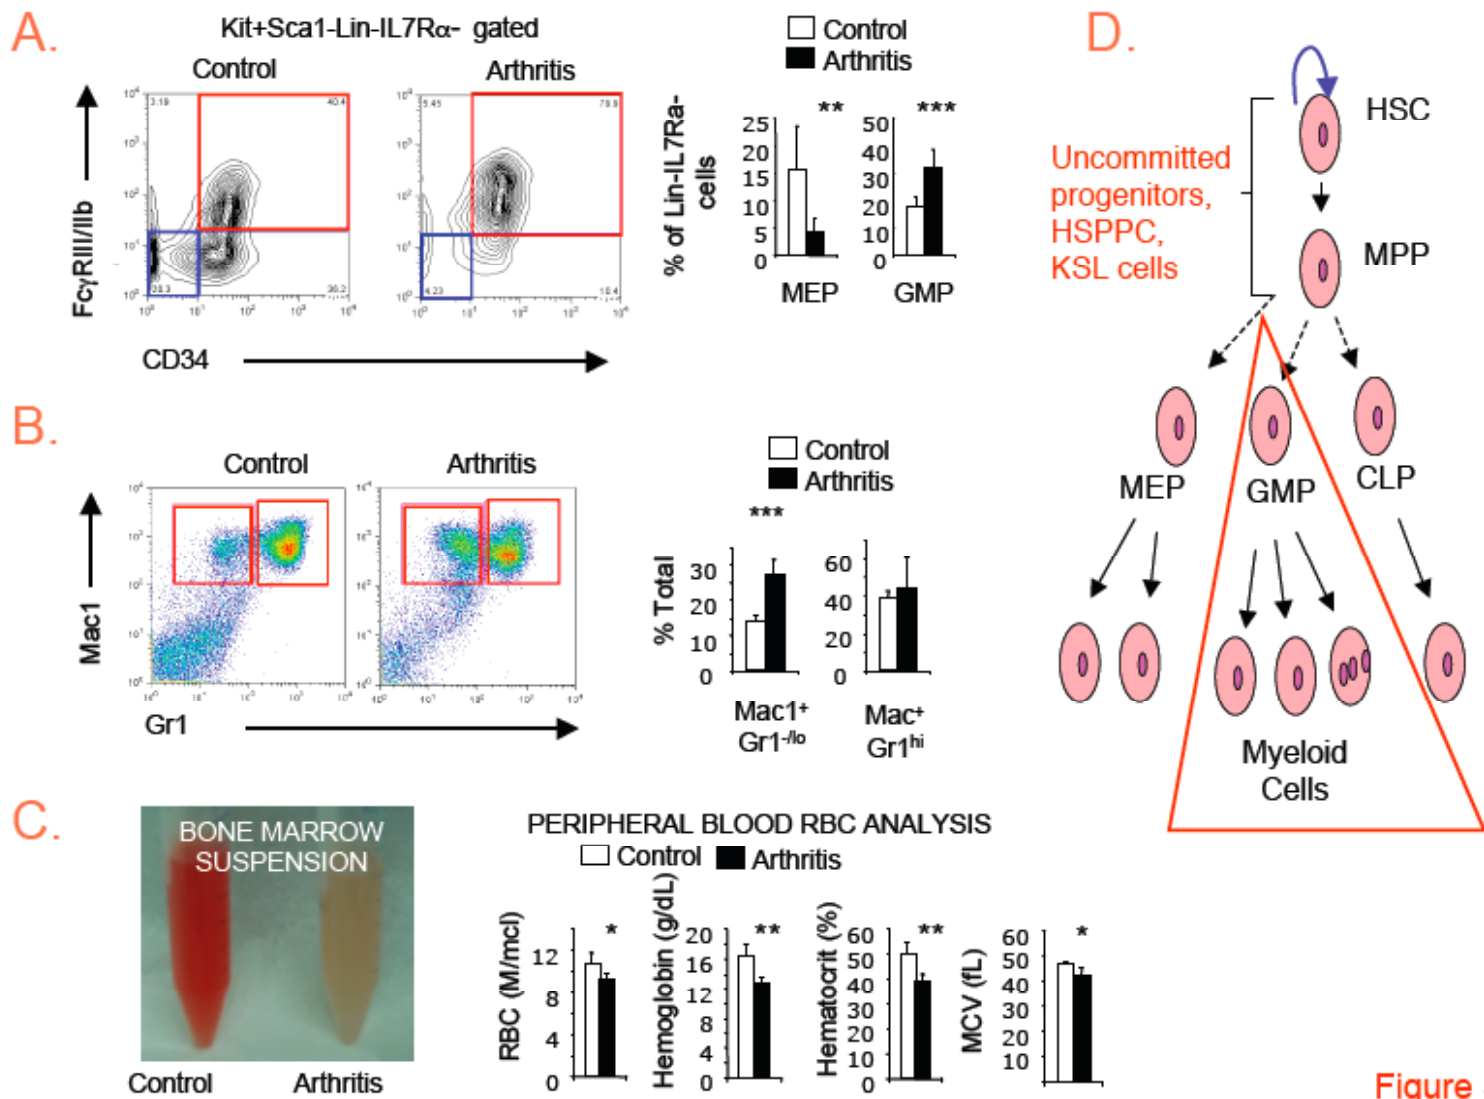

Figure S2



## Figure S2. Myeloid skewing in arthritic bone marrow

A. *Left Panel:* Representative FACS plot for analysis of BM committed progenitors. GMPs and MEPs are Fc $\gamma$ RIII/II+CD34+ (red gate) and Fc $\gamma$ RIII/II-CD34- (blue gate) respectively within Kit+Sca1-Lin-IL7R $\alpha$ - cells.

*Right Panel:* GMP and MEP frequencies normalized to total Lin-IL7R $\alpha$ - myeloerythroid progenitors.

B. *Left Panel:* Representative FACS plots of Mac1 and Gr1 stained bone marrow (BM) with gated Mac1+Gr1lo and Mac1+Gr1hi populations (red gates).

*Right Panel:* Mean frequency and standard deviation of BM Mac1+Gr1lo and Mac1+Gr1hi populations.

C. *Left Panel:* Marrow suspensions from tibiae and femur of control and arthritic mice. Red color is indicative of red blood cell (RBC) content in bone marrow.

*Right Panel:* RBC parameters in peripheral blood analysis. Splenic extramedullary erythropoiesis (data not shown) compensates for the profound BM RBC deficit. Nevertheless, RBC counts and hemoglobin are still reduced in the peripheral blood of arthritic mice. RBC = RBC count, MCV=Mean Corpuscular Volume.

D. Pictorial description of myeloid skewing in arthritic marrow (cells in red triangle are increased relative to other cells on the same level). This paper examines if the basis of this skewing stems from uncommitted progenitors that sit at the top of this developmental hierarchy. HSC = Hematopoietic Stem Cell. MPP = Multipotential Progenitor. MEP = Megakaryocyte Erythrocyte Progenitor. GMP = Granulocyte Monocyte Progenitor. CLP = Common Lymphoid Progenitor

\*\*p<0.01\*\*\*p<0.001

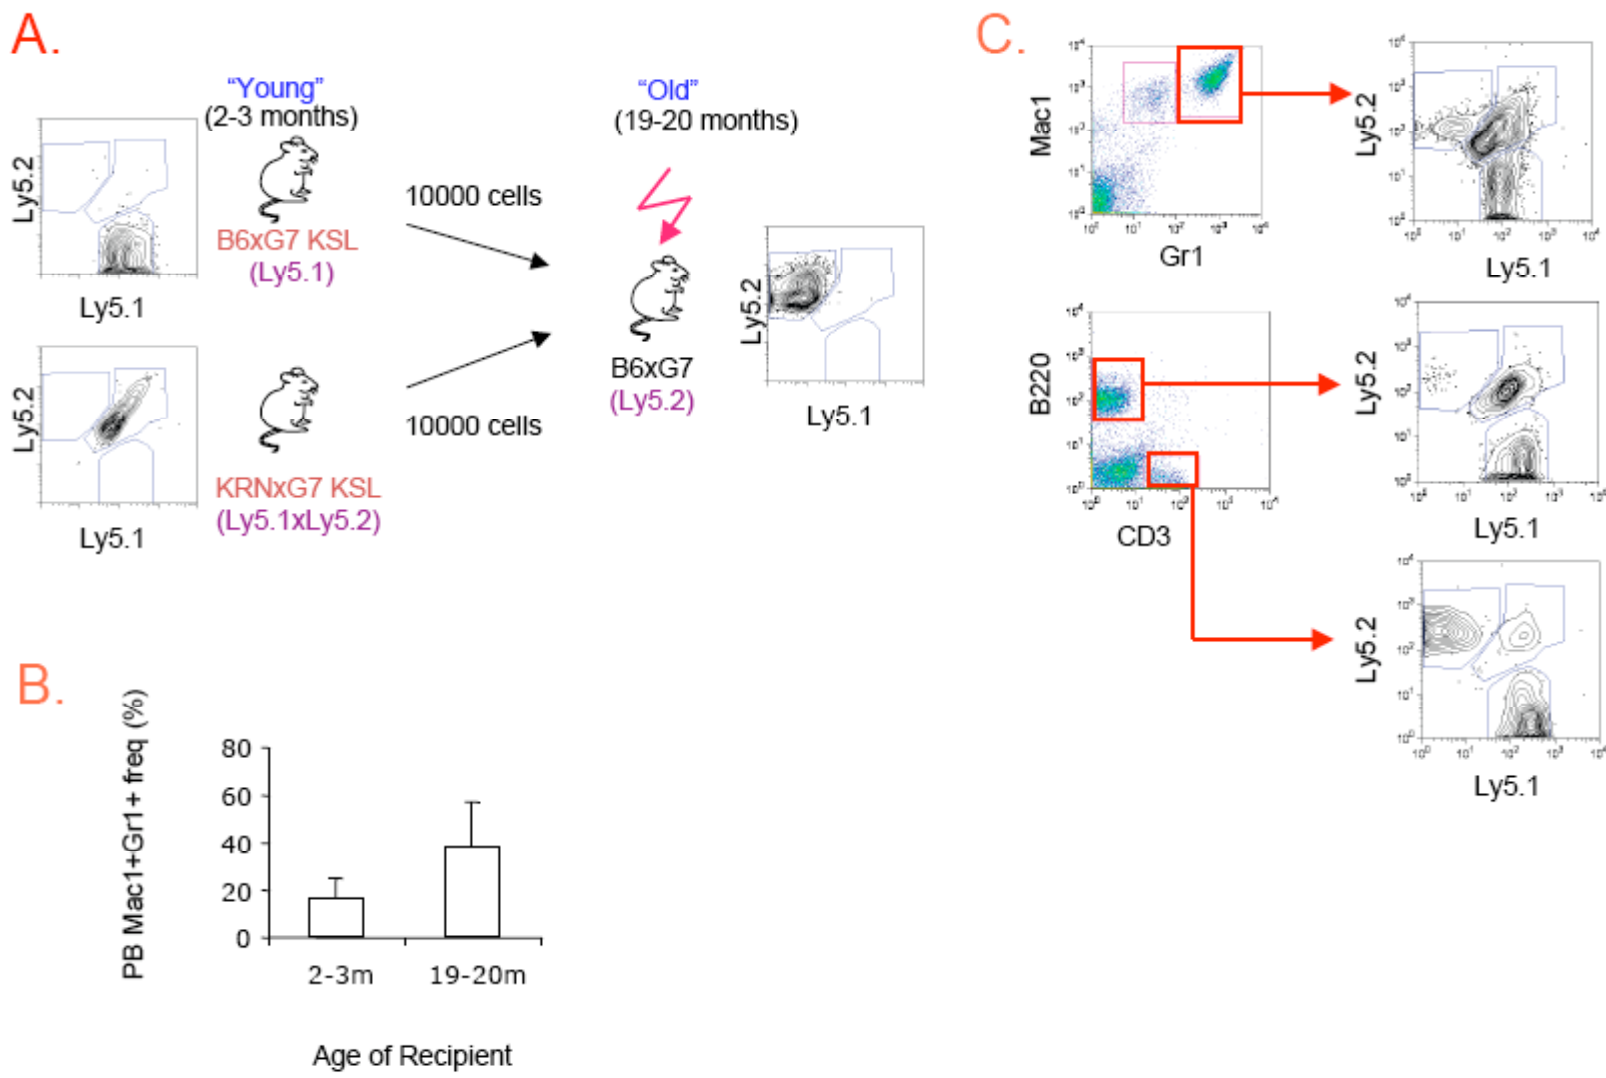

Figure S3

**Figure S3. Mature cell analysis of transplanted mice using young and old recipients, Related to Figure 2**

- A. Experimental scheme for transplantation into old B6xG7 recipients. Note that CD45 alleles of B6xG7 donor, KRNxG7 donor and B6xG7 recipient mice are slightly different from what was used for the young recipient experiment.
- B. Peripheral blood (PB) frequency of myeloid (Mac1+Gr1+) cells 2 months after competitive transplantation of arthritic and control KSL cells in young (2-3 month old) or old (19-20 month old) recipients.
- C. Representative FACS plots showing gating scheme for analysis of myeloid cells (Mac1+Gr1hi), B cells (B220+; also CD3-) and T cells (CD3+; also B220-) in peripheral blood of recipient mice 8 weeks after transplantation. Gated cells are further analyzed for CD45.1 (Ly5.1) versus CD45.2 (Ly5.2) to determine arthritic donor derived cells (Ly5.1+) versus control donor derived cells (Ly5.1+) versus recipient derived cells (Ly5.1+Ly5.2+).

A.

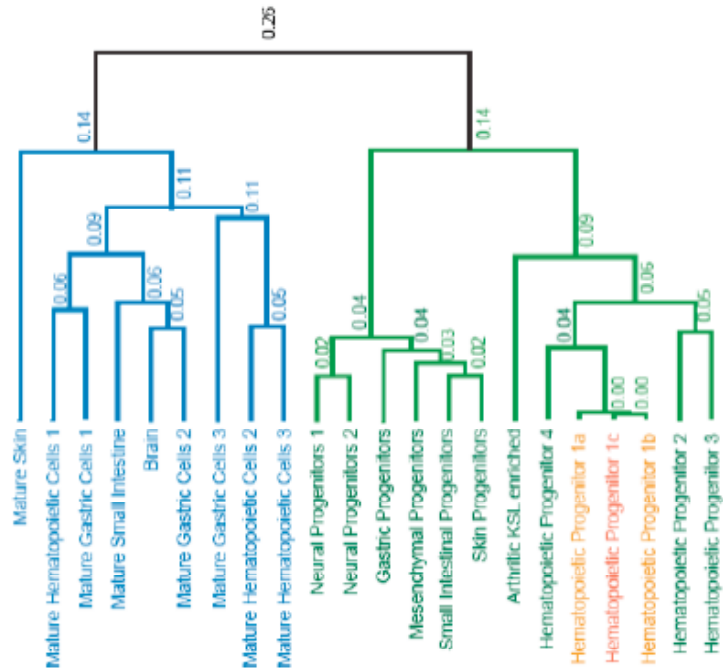

B.

| Category          | Term                                          | RT | Genes | Count | %   | P-Value | Fold Enrichment |
|-------------------|-----------------------------------------------|----|-------|-------|-----|---------|-----------------|
| → PIR_SUPERFAMILY | PIRSF005879:CCAAT/enhancer-binding protein    | RT |       | 3     | 0.7 | 1.8E-3  | 41.8            |
| → PIR_SUPERFAMILY | PIRSF005879:CCAAT/enhancer-binding            | RT |       | 3     | 0.7 | 1.8E-3  | 41.8            |
| → INTERPRO        | <a href="#">CCAAT/enhancer-binding</a>        | RT |       | 3     | 0.7 | 2.4E-3  | 36.7            |
| PIR_SUPERFAMILY   | PIRSF007286:Smad protein                      | RT |       | 3     | 0.7 | 4.5E-3  | 27.9            |
| GOTERM_BP_FAT     | <a href="#">embryonic hemopoiesis</a>         | RT |       | 5     | 1.1 | 3.8E-5  | 23.4            |
| INTERPRO          | <a href="#">Dwarf1n</a>                       | RT |       | 3     | 0.7 | 1.1E-2  | 18.4            |
| INTERPRO          | <a href="#">SMAD domain, Dwarf1n-type</a>     | RT |       | 3     | 0.7 | 1.1E-2  | 18.4            |
| INTERPRO          | <a href="#">MAD homology, Mh1</a>             | RT |       | 3     | 0.7 | 1.1E-2  | 18.4            |
| GOTERM_BP_FAT     | <a href="#">Inactivation of MAPK activity</a> | RT |       | 3     | 0.7 | 1.2E-2  | 17.6            |
| UP_SEQ_FEATURE    | domain:MH2                                    | RT |       | 3     | 0.7 | 1.3E-2  | 16.5            |

Figure S4

**Figure S4. Gene Expression Analysis of Arthritic and Control KSL cells, Related to Figure 3**

- A. Dendrogram comparing arthritic KSL enriched expression profile (“hematopoietic progenitor 1c; red color) and control KSL enriched expression profile (“hematopoietic progenitor 1a & 1b”) to each other and to profiles of stem cells (green) and mature cells (blue) from previous studies (See Table S2). Mature Lin+ expression was used as a baseline for determining KSL enriched genes. Profile of genes enriched in arthritic KSL cells relative to control KSL cells is represented by “arthritic KSL enriched”. See Table S2 for references for gene chips from previous studies used in this dendrogram analysis.
- B. Functional annotation terms enriched in genes upregulated in arthritic KSL cells based on DAVID Bioinformatics analysis <sup>7</sup>. Only terms with at least 3 genes represented in the upregulated gene list with  $p < 0.05$  were used in the analysis. Top 10 most enriched terms (based on “fold enrichment”) are shown. Orange arrows highlight that C/EBP transcription factors are highly enriched in genes upregulated in arthritic KSL cells.

A.

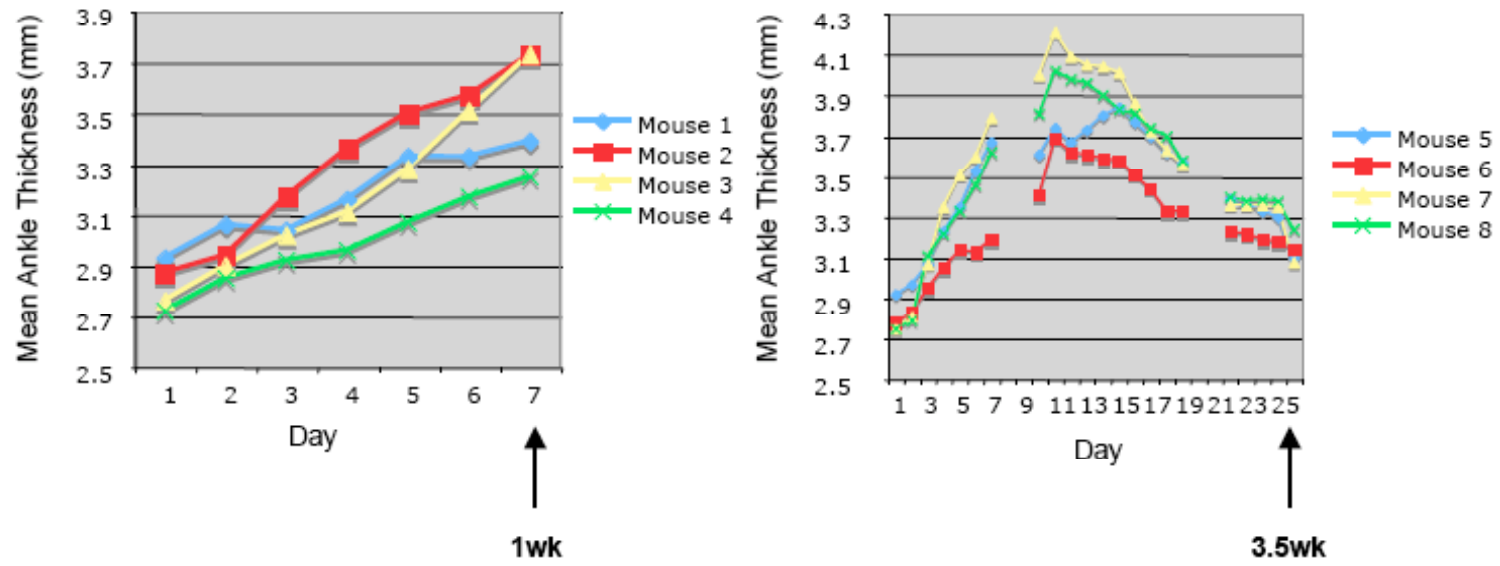

B.

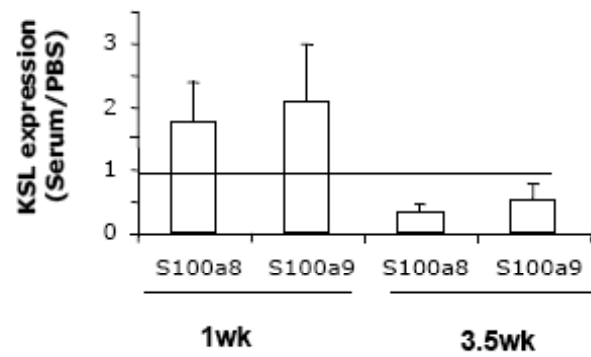

Figure S5

**Figure S5. Increased S100a8 and S100a9 expression in arthritic KSL cells is reversed during disease resolution, Related to Figure 3**

- A. Ankle thickness of B6 mice after injection of 250 $\mu$ l of arthritogenic serum. 8 mice were used 4 of which were followed for 1 week (left panel), the others for 3.5 weeks (right panel). No change in ankle thickness of control PBS injected B6 mice occurred during these periods of follow up (not shown). The cohorts used for this experiment are different from the cohort used for Figure 3D experiment.
- B. S100a8 and S100a9 expression of KSL cells sorted from mice with serum transfer arthritis during active disease (1week; 1wk) and during disease resolution (3.5 weeks; 3.5wk). Expression is normalized to PBS injected controls since 1 wk and 3.5 wk mice were sacrificed on different days. The dashed line indicates equal expression in KSL cells from serum injected and PBS injected mice.

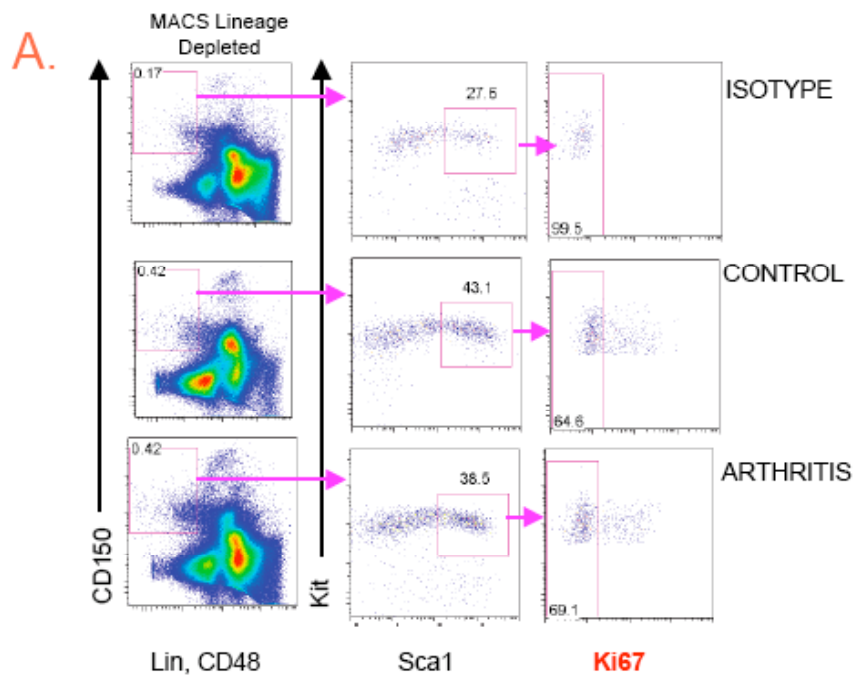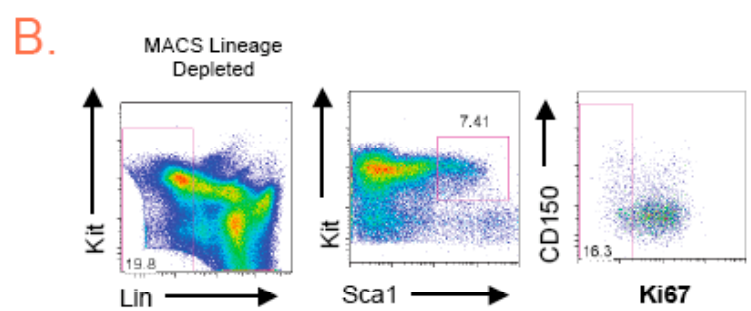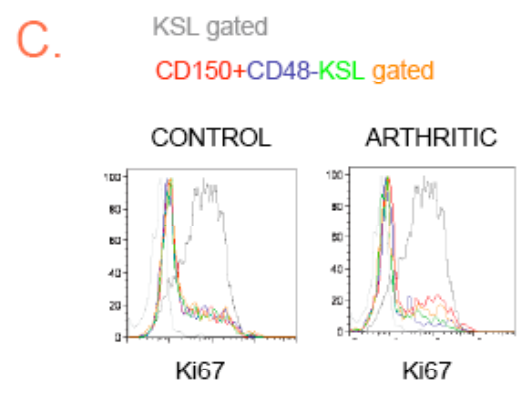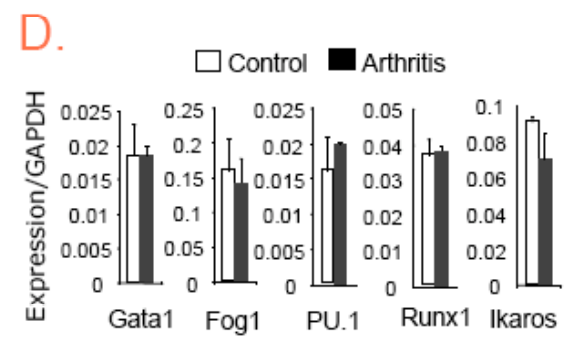

Figure S6



**Figure S6. Quiescent HSCs from arthritic and control mice express similar levels of various transcription factors, Related to Figure 4**

- A. Representative FACS plots depicting gating scheme for analysis of quiescent fraction of CD150+CD48-KSL IL7R $\alpha$ - cells (HSCs) in bone marrow of arthritic and control mice based on intracellular Ki67 expression. An isotype control antibody (Top panel) aided in setting the Ki67 negative gate.
- B. FACS plots depicting Ki67 analysis of KSL cells.
- C. Most KSL cells (dark grey solid histogram) are Ki67+ (non quiescent). However most KSL CD150+CD48- cells (colored histograms) from both arthritic and control mice are Ki67- (quiescent). Light grey/hatched histogram represents isotype control.
- D. Quantitative RT-PCR of transcription factors in arthritic and control HSCs (CD150+CD48-CD34-KSL IL7R $\alpha$ -). Mean and standard deviation of GAPDH normalized expression is shown.

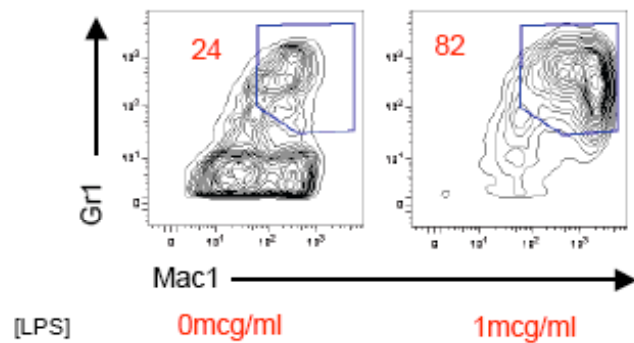

Figure S7

**Figure S7. LPS promotes myeloid skewed output from arthritic KSL cells, Related to Figure 5**

Naïve KSL cells from B6 mice is cultured on OP9 cells with KitL, Flt3L, IL-7 with and without LPS.

CD34-CD48-KSL gated

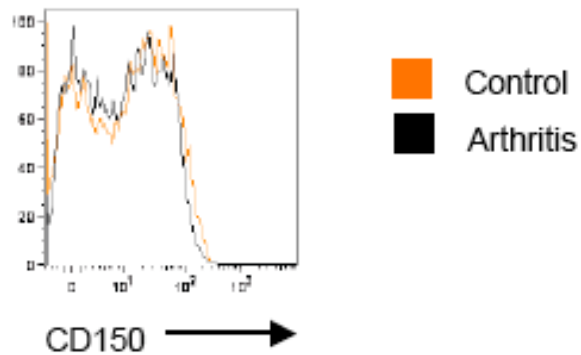

Figure S8

**Figure S8. CD150 expression is similar in CD34-CD48-KSL cells from arthritic and control mice**

FACS Histogram showing CD150 expression of CD34-CD48-KSL cells.

## SUPPLEMENTARY REFERENCES

1. Kouskoff V, Korganow AS, Duchatelle V, Degott C, Benoist C, Mathis D. Organ-specific disease provoked by systemic autoimmunity. *Cell*. Nov 29 1996;87(5):811-822.
2. Korganow AS, Ji H, Mangialaio S, et al. From systemic T cell self-reactivity to organ-specific autoimmune disease via immunoglobulins. *Immunity*. Apr 1999;10(4):451-461.
3. Ma YD, Park C, Zhao H, et al. Defects in osteoblast function but no changes in long-term repopulating potential of hematopoietic stem cells in a mouse chronic inflammatory arthritis model. *Blood*. Nov 12 2009;114(20):4402-4410.
4. Doherty JM, Carmichael LK, Mills JC. GOourmet: a tool for quantitative comparison and visualization of gene expression profiles based on gene ontology (GO) distributions. *BMC Bioinformatics*. 2006;7:151.
5. Doherty JM, Geske MJ, Stappenbeck TS, Mills JC. Diverse adult stem cells share specific higher-order patterns of gene expression. *Stem Cells*. Aug 2008;26(8):2124-2130.
6. Dennis G, Jr., Sherman BT, Hosack DA, et al. DAVID: Database for Annotation, Visualization, and Integrated Discovery. *Genome Biol*. 2003;4(5):P3.
7. Huang da W, Sherman BT, Lempicki RA. Systematic and integrative analysis of large gene lists using DAVID bioinformatics resources. *Nat Protoc*. 2009;4(1):44-57.
8. Huang da W, Sherman BT, Lempicki RA. Bioinformatics enrichment tools: paths toward the comprehensive functional analysis of large gene lists. *Nucleic Acids Res*. Jan 2009;37(1):1-13.
9. Lugus JJ, Chung YS, Mills JC, et al. GATA2 functions at multiple steps in hemangioblast development and differentiation. *Development*. Jan 2007;134(2):393-405.

10. Feezor RJ, Paddock HN, Baker HV, et al. Temporal patterns of gene expression in murine cutaneous burn wound healing. *Physiol Genomics*. Feb 13 2004;16(3):341-348.
11. Ramsey VG, Doherty JM, Chen CC, Stappenbeck TS, Konieczny SF, Mills JC. The maturation of mucus-secreting gastric epithelial progenitors into digestive-enzyme secreting zymogenic cells requires Mist1. *Development*. Jan 2007;134(1):211-222.
12. Hooper LV, Wong MH, Thelin A, Hansson L, Falk PG, Gordon JI. Molecular analysis of commensal host-microbial relationships in the intestine. *Science*. Feb 2 2001;291(5505):881-884.
13. Ramalho-Santos M, Yoon S, Matsuzaki Y, Mulligan RC, Melton DA. "Stemness": transcriptional profiling of embryonic and adult stem cells. *Science*. Oct 18 2002;298(5593):597-600.
14. Mills JC, Syder AJ, Hong CV, Guruge JL, Raaii F, Gordon JI. A molecular profile of the mouse gastric parietal cell with and without exposure to *Helicobacter pylori*. *Proc Natl Acad Sci U S A*. Nov 20 2001;98(24):13687-13692.
15. Ivanova NB, Dimos JT, Schaniel C, Hackney JA, Moore KA, Lemischka IR. A stem cell molecular signature. *Science*. Oct 18 2002;298(5593):601-604.
16. Mills JC, Andersson N, Hong CV, Stappenbeck TS, Gordon JI. Molecular characterization of mouse gastric epithelial progenitor cells. *Proc Natl Acad Sci U S A*. Nov 12 2002;99(23):14819-14824.
17. Sharov AA, Piao Y, Matoba R, et al. Transcriptome analysis of mouse stem cells and early embryos. *PLoS Biol*. Dec 2003;1(3):E74.
18. Stappenbeck TS, Mills JC, Gordon JI. Molecular features of adult mouse small intestinal epithelial progenitors. *Proc Natl Acad Sci U S A*. Feb 4 2003;100(3):1004-1009.
19. Tumber T, Guasch G, Greco V, et al. Defining the epithelial stem cell niche in skin. *Science*. Jan 16 2004;303(5656):359-363.

20. Phillips RL, Ernst RE, Brunk B, et al. The genetic program of hematopoietic stem cells. *Science*. Jun 2 2000;288(5471):1635-1640.
